# Supplementary material
Source: PubMed Central journal article supplement (PMC7165438)
Supplement: pnas.1911999117.sapp.pdf [file pnas.1911999117.sapp.pdf]

2

3 SUPPLEMENTARY INFORMATION

4

5 **Sex differences in adult lifespan and aging**  
6 **rates of mortality across wild mammals**

7

8 **Jean-François Lemaître<sup>1\*‡</sup>, Victor Ronget<sup>1‡</sup>, Morgane Tidière<sup>1</sup>, Dominique**  
9 **Allainé<sup>1</sup>, V erane Berger<sup>2</sup>, Aur elie Cohas<sup>1</sup>, Fernando Colchero<sup>3,4</sup>, Dalia Conde<sup>3,5</sup>,**  
10 **Michael Garratt<sup>6</sup>, Andr as Liker<sup>7</sup>, Gabriel A.B. Marais<sup>1</sup>, Alexander**  
11 **Scheuerlein<sup>8</sup>, Tam as Sz ekely<sup>9,10</sup>, Jean-Michel Gaillard<sup>1</sup>**

12 <sup>1</sup> Univ Lyon, Universit  Lyon 1, CNRS, Laboratoire de Biom trie et Biologie  volutive UMR 5558, F-69622,  
13 Villeurbanne, France.

14 <sup>2</sup> Department of Biology, University of Turku, Turku, Finland.

15 <sup>3</sup> Interdisciplinary Center on Population Dynamics, CPop, University of Southern Denmark, Odense, Denmark

16 <sup>4</sup> Department of Mathematics and Computer Science (IMADA), University of Southern Denmark, Odense, Denmark.

17 <sup>5</sup> Species 360 Conservation Science Alliance, Bloomington, MN, 55425, USA

18 <sup>6</sup> School of Biomedical Sciences, Department of Anatomy, University of Otago, New Zealand.

19 <sup>7</sup> MTA-PE Evolutionary Ecology Research Group, Department of Limnology, University of Pannonia, Pf. 158, H-  
20 8201 Veszpr m, Hungary.

21 <sup>8</sup> Max Planck Institute for Demographic Research, Rostock 18057, Germany.

22 <sup>9</sup> Milner Centre for Evolution, Department of Biology and Biochemistry, University of Bath, Bath BA2 7AY, UK.

23 <sup>10</sup> Department of Evolutionary Zoology and Human Biology, University of Debrecen, Debrecen H-4032, Hungary.

24

25 ‡ Equal contribution

26 \* *Author for correspondence:* [jean-francois.lemaitre@univ-lyon1.fr](mailto:jean-francois.lemaitre@univ-lyon1.fr) (ORCID: 0000-0001-9898-  
27 2353)

28

29

30 **Rate of aging relative to adult lifespan.** Median adult lifespan and rates of aging were negatively  
31 associated across mammals (phylogenetic regression: slope =  $-0.38 \pm 0.16$ ,  $p < 0.001$ ,  $R^2 = 0.56$ ,  
32 see statistical analyses for method and models used for all the regressions and the Fig. S2). Short-  
33 lived species age thus faster than long-lived species, as well established in the aging literature (1,  
34 2). To obtain measures of aging rates independent of adult lifespan (hereafter called *relative aging*  
35 rate), we also computed the aging rate relative to adult lifespan as the residuals of the  
36 phylogenetically corrected relationship between the parameter  $b_I$  (see methods, Eq. (1)) and adult  
37 lifespan (both log-transformed) as follows

$$39 \text{ Relative aging rate} = \log(\text{rate of aging}) - (-0.38) \times \log(\text{adult lifespan}) - 0.55 \quad (5)$$

40  
41 To account for the negative association between adult lifespan and aging rate, we performed a  
42 similar analysis to *absolute* aging rate (see Methods) using the relative aging rate and we found  
43 similar results. There were no consistent differences between males and females in aging rates.  
44 The Null model was ranked first (Table S5), revealing that none of the sexual size dimorphism,  
45 hunting status and data quality influenced the magnitude of sex differences in relative aging rates.  
46 There was also no effect of mating or social system (mean difference<sub>monogamous vs. polygynous</sub> = -0.08  
47 [-0.53; 0.36], mean difference<sub>monogamous vs. promiscuous</sub> = -0.01 [-0.49; 0.41], mean difference<sub>cooperative</sub>  
48 vs. non-cooperative breeder = -0.18 [-0.58; 0.21]).

49  
50 **Relationship between male and female adult lifespan.** To assess whether sex differences in adult  
51 lifespan were the same in fast or slow life histories, we first ran a Bayesian hierarchical analysis  
52 (see Materials and Methods) for all species by regressing male adult lifespan against female adult

53 lifespan. Same sex differences in median adult lifespan between slow and fast life histories should  
54 lead to a slope close to 1. However, the estimated slope was lower than 1 (slope = 0.87 [0.81;  
55 0.94], Fig S3), showing that sex differences in adult lifespan in favour of females increase with  
56 female adult lifespan (i.e. longer-lived species).

57  
58

## 59 **References**

60

61 1. Jones OR, et al. (2008) Senescence rates are determined by ranking on the fast–slow life-  
62 history continuum. *Ecology Letters* 11(7):664–673.

63 2. Ricklefs RE (2010) Life-history connections to rates of aging in terrestrial vertebrates.  
64 *Proceedings of the National Academy of Sciences* 107(22):10314–10319.

65

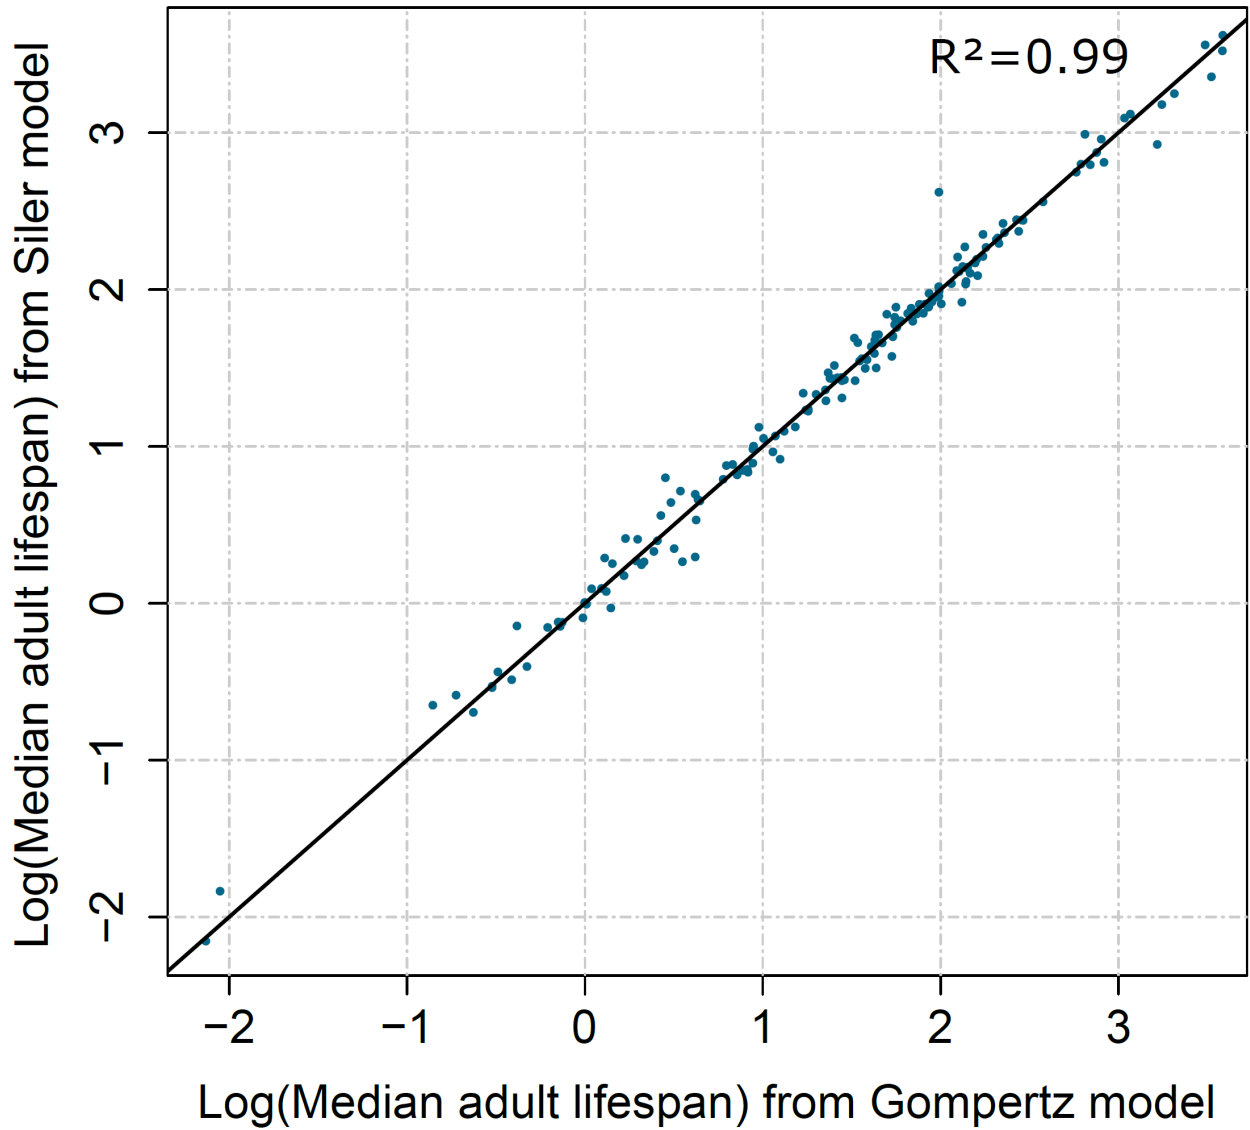

66

67

68

**Fig. S1.**

69

70 Relationship between median adult lifespan estimated using a Gompertz model and median adult  
71 lifespan estimated using a Siler model (only 'longitudinal' and 'transversal-dx' data were included  
72 in this analysis).

73

74

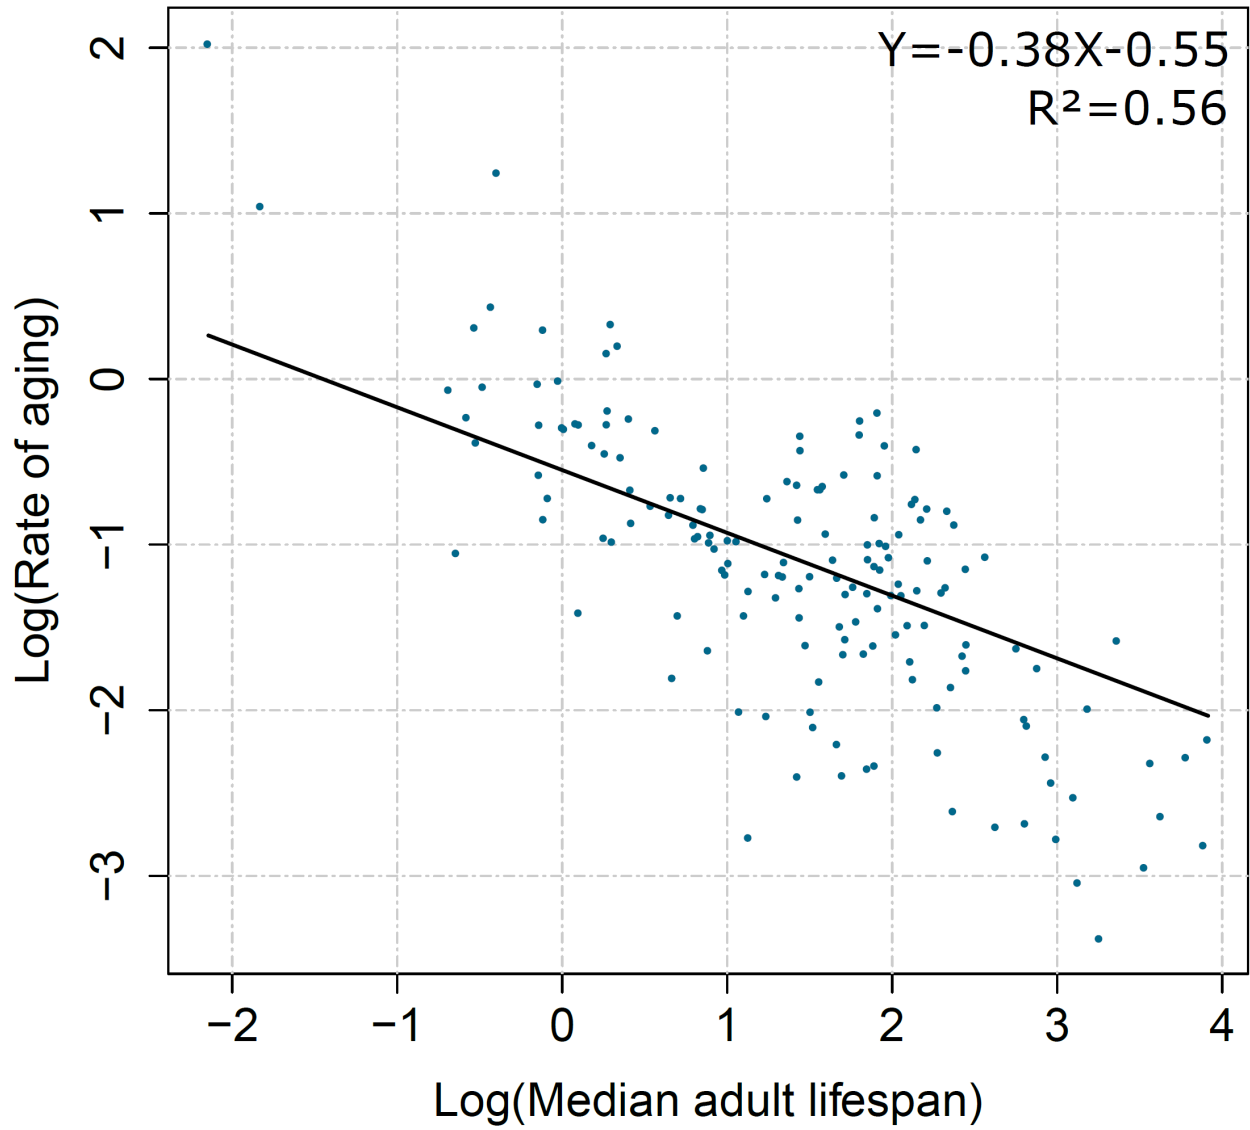

75

76

77

**Fig. S2.**

78

79 Relationship between rate of aging and median adult lifespan on a log-log scale.

80

81

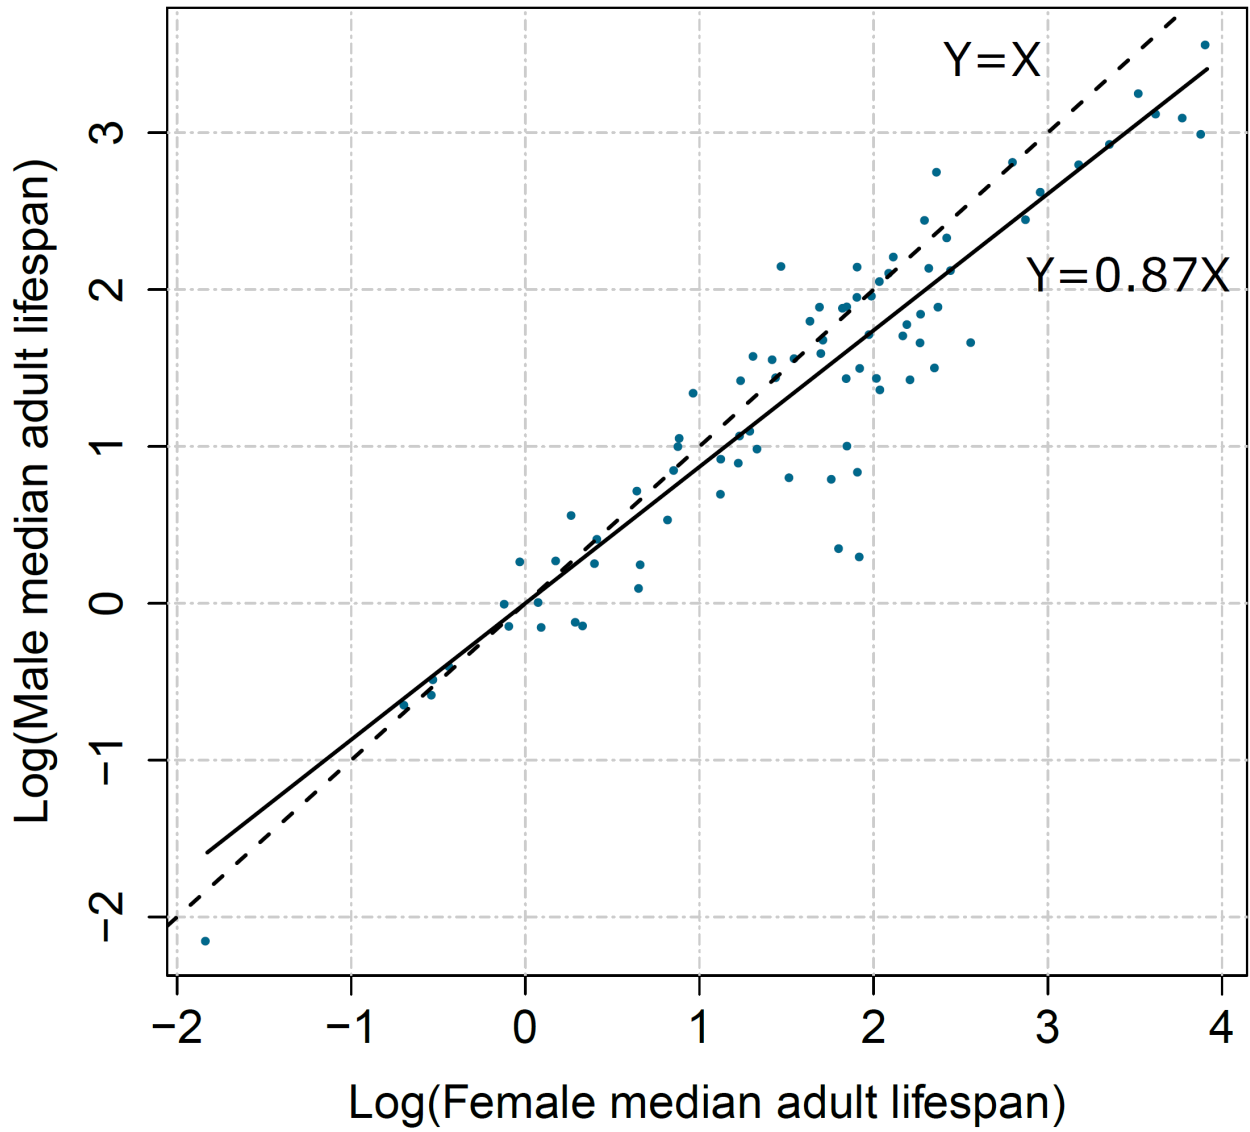

82

83

**Fig. S3.**

84

85 Allometric relationship between male and female median adult lifespan. The best regression line  
86 is in black. The dash line represents isometry (i.e. slope of 1).

87

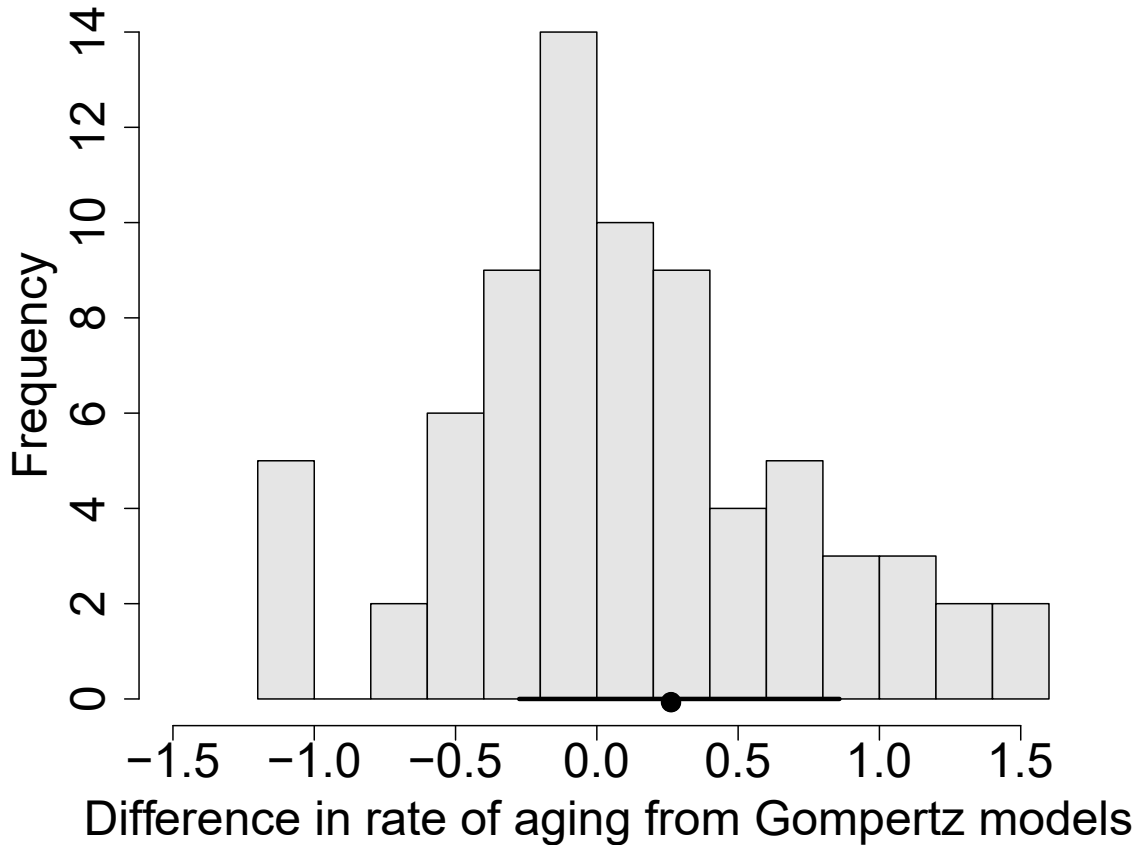

88

89

**Fig. S4.**

90 Frequency distribution of the magnitude of sex differences in rate of aging estimated from species-  
 91 specific Gompertz models across mammals in the wild (a). The black dot corresponds to the overall  
 92 effect for non-human mammals and is associated with its 95 % credibility interval. Compared to  
 93 Figure 2 that displays the picture obtained from species-specific Siler models, seven species  
 94 (*Mandrillus sphinx*, *Mirounga leonina*, *Muscardinus avellanarius*, *Mustela erminea*, *Myotis*  
 95 *lucifugus*, *Spermophilus beldingi*, *Tamias striatus*) have been removed because their estimates of  
 96 the Gompertz rate of aging were negative, making impossible any computation of sex-differences  
 97 in aging rates.

98

99

100 **Table S1.** Ranking of the different models for the analysis of sex differences in adult lifespan  
101 using Deviance Information Criterion. The selected model is in bold (SSD: sexual size  
102 dimorphism). Only the five models with the highest support are presented.

103

| Models                                   | DIC          | $\Delta$ DIC |
|------------------------------------------|--------------|--------------|
| <b>Hunted+Quality+SSD</b>                | <b>118.8</b> | <b>0</b>     |
| Hunted+Quality (Null model)              | 119.0        | 0.11         |
| Hunted+Quality+SSD+ Sex-biased detection | 119.8        | 0.97         |
| Hunted+Quality+Sex-biased detection      | 120.0        | 1.21         |
| Hunted+Quality+SSD+Hunted*SSD            | 120.5        | 1.63         |

104

105



106 **Table S2.** Ranking of the different models for the analysis of the sex differences in rate of aging  
 107 using Deviance Information Criterion. Selected model is in bold (SSD: sexual size dimorphism).  
 108 Only the five models with the highest support are presented.

109

110

| Models                                                      | DIC         | $\Delta$ DIC |
|-------------------------------------------------------------|-------------|--------------|
| <b>Hunted + Quality (Null model)</b>                        | <b>89.5</b> | <b>0</b>     |
| Hunted + Quality + Hunted*Quality                           | 89.5        | 0            |
| Hunted + Quality + Sex-biased detection                     | 90.4        | 0.9          |
| Hunted + Quality + Sex-biased detection +<br>Hunted*Quality | 90.4        | 0.9          |
| Hunted + Quality + SSD                                      | 90.8        | 1.3          |

111

112

113 **Table S3.** Mean of the posterior distribution of sex differences in median adult lifespan from the  
 114 null model (a) and the model with the highest support (b). Each parameter is associated with the  
 115 lower and upper limits of 95% credibility interval.

116

117 a: Null Model

118

| Parameter                     | Mean   | Lower CI | Upper CI |
|-------------------------------|--------|----------|----------|
| Sex difference<br>(Intercept) | -0.171 | -0.376   | 0.036    |

122

123 b: Model with highest support based on DIC

| Parameters                    | Mean   | Lower CI | Upper CI |
|-------------------------------|--------|----------|----------|
| Intercept                     | -0.165 | -0.372   | -0.071   |
| Hunted (Yes)                  | -0.142 | -0.335   | 0.041    |
| Data quality<br>(transversal) | 0.121  | -0.027   | 0.269    |
| SSD                           | -0.226 | -0.490   | 0.042    |

124

125

126

127

128 **Table S4.** Mean of the posterior distribution of sex differences in *relative* aging rate from the null  
129 model. The mean sex difference is associated with the lower and upper limits of 95% credibility  
130 interval.

131

132

| Parameter                     | Mean  | Lower CI | Upper CI |
|-------------------------------|-------|----------|----------|
| Sex difference<br>(intercept) | 0.191 | -0.144   | 0.545    |

133

134

135

136

137 **Table S5.** Ranking of the different models of the sex difference in *relative* aging rate using  
138 Deviance Information Criterion. The selected model is in bold (SSD: sexual size dimorphism, Sex-  
139 bias in individual detection). Only the five models with the highest support are presented.

140

141

| Models                                                      | DIC         | $\Delta$ DIC |
|-------------------------------------------------------------|-------------|--------------|
| <b>Hunted + Quality (Null model)</b>                        | <b>89.4</b> | <b>0</b>     |
| Hunted + Quality + Hunted*Quality                           | 89.4        | 0            |
| Hunted + Quality + Hunted*Quality + Sex-biased<br>detection | 90.2        | 0.8          |
| Hunted + Quality + Sex-biased detection                     | 90.4        | 1            |
| Hunted + Quality + SSD                                      | 90.7        | 1.3          |

142

143

144 **Supplementary data S1.** Full list of mammalian populations with age- and sex-specific mortality  
145 data recovered during our literature survey. The column yes/no indicates whether the population  
146 is considered or not in our analyses. When the population was not retained, we provide a  
147 justification.

148

149 **Supplementary data S2.** Body mass (male and female, in grams), age at first reproduction (in  
150 years) and mating system (monogamous, polygynous or promiscuous) and associated references  
151 for each population used in the analyses.

152

153 **Supplementary data S3.** Data on sample size, type of studies (longitudinal, transversal\_lx or  
154 transversal\_dx), social system (cooperative breeder: CB or non-cooperative breeder: NCB),  
155 hunting status (yes / no), parameters of the Siler model (a0\_Siler, a1\_Siler, c\_Siler, b0\_Siler,  
156 b1\_Siler), parameters of the Gompertz model for males (a\_Gompertz, b\_Gompertz), adult  
157 lifespan\_80, mean adult lifespan, adult lifespan\_50 and lifespan\_max per sex and for each  
158 mammalian population used in the analyses. The full definition of each variable is provided in the  
159 Material and Methods section.

160

161 **Supplementary data S4.** Data on possible sex-specific bias in detection rate for each mammalian  
162 population included in our analysis.
